# Supplementary material for: Penta and hexanuclear nickel tiara-like clusters with two different thiolate bridges
Source: Royal Society of Chemistry journal article supplement (doi:10.1039/c5ce00863h), 2015-01-01
Supplement: c5ce00863h1.pdf [file c5ce00863h1.pdf]

## Supplementary Information

### **Penta- and hexa-nuclear nickel tiara-like clusters with two different thiolate bridges**

Chunhong Tan, Meiliang Jin, Hao Zhang, Shengmin Hu, Tianlu Sheng\* and Xintao Wu

*State Key Laboratory of Structural Chemistry, Fujian Institute of Research on the Structure of Matter, Chinese*

*Academy of Sciences, Fuzhou, Fujian 350002, China.*

- Corresponding author:  
E-mail: [tsheng@fjirsm.ac.cn](mailto:tsheng@fjirsm.ac.cn).  
Tel: +86-591-83792294; Fax: +86-591-83719238

## Supplemental synthetic procedures

**cyclo-[Ni( $\mu$ -EDT)]<sub>5</sub> (1)** A mixture of Ni(ClO<sub>4</sub>)<sub>2</sub>·6H<sub>2</sub>O (144 mg, 0.4 mmol), 1,2-ethanedithiol (0.036 ml, 0.4 mmol) and sodium ethylate (56 mg, 0.8 mmol) in 12 ml ethanol was stirred at room temperature for 1 h. Then DMF (4 ml) were added. The resulting black red slurry was sealed in a 20 ml Teflonlined autoclave and heated at 403 K for 16 h. After the autoclave was cooled to room temperature, black cuboid crystals of **1** were separated by filtration, washed with ethanol, and dried in air (yield: ca. 35% for **1**).

**cyclo-{[Ni( $\mu$ -SiPe)<sub>2</sub>]<sub>6</sub>}** (**2**) A mixture of Ni(ClO<sub>4</sub>)<sub>2</sub>·6H<sub>2</sub>O (144 mg, 0.4 mmol), isopentylthiol (0.10 ml, 0.8 mmol) and sodium ethylate (56 mg, 0.8 mmol) in 12 ml ethanol was stirred at room temperature for 1 h. Then DMF (4 ml) were added. The resulting black red slurry was sealed in a 20 ml Teflonlined autoclave and heated at 403 K for 16 h. After the autoclave was cooled to room temperature, black block crystals of **2** were separated by filtration, washed with ethanol, and dried in air (yield: ca. 41% for **2** based on Ni(ClO<sub>4</sub>)<sub>2</sub>·6H<sub>2</sub>O).

**Scheme S1.** Mechanism of the in situ synthesis of thiophenol.

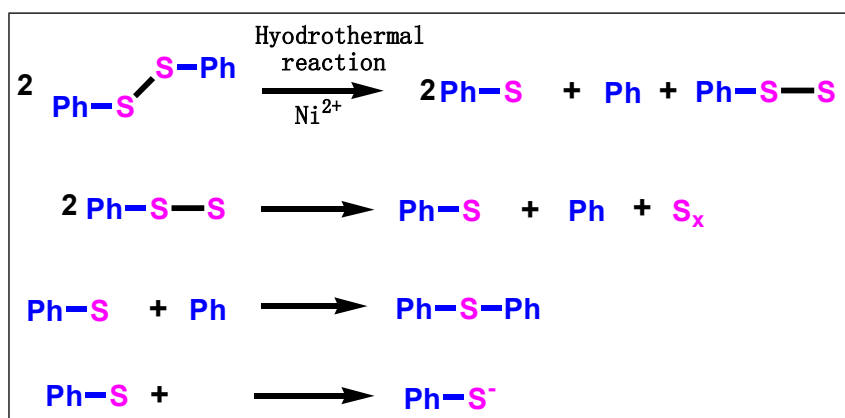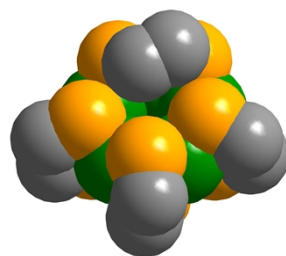

**Fig. S1** Molecular view of **1** in space filling model. The hydrogen atoms are omitted for clarity (Ni green, S yellow, C gray).

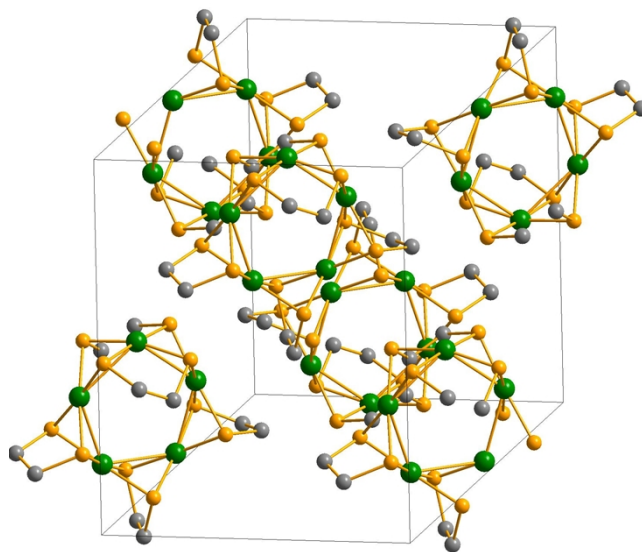

**Fig. S2** Crystal packing pattern of **1**. The hydrogen atoms are omitted for clarity (Ni green, S yellow, C gray).

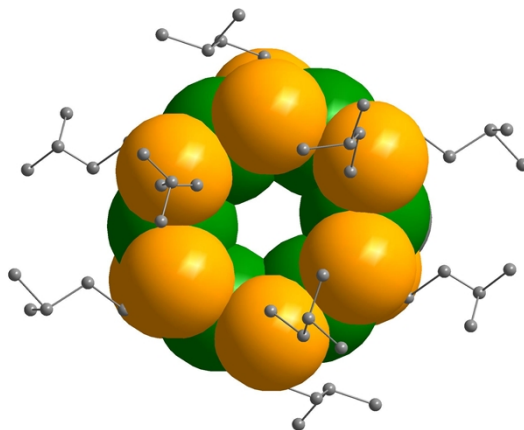

**Fig. S3** Molecular view of **2** in space filling model. The hydrogen atoms are omitted for clarity (Ni green, S yellow, C gray).

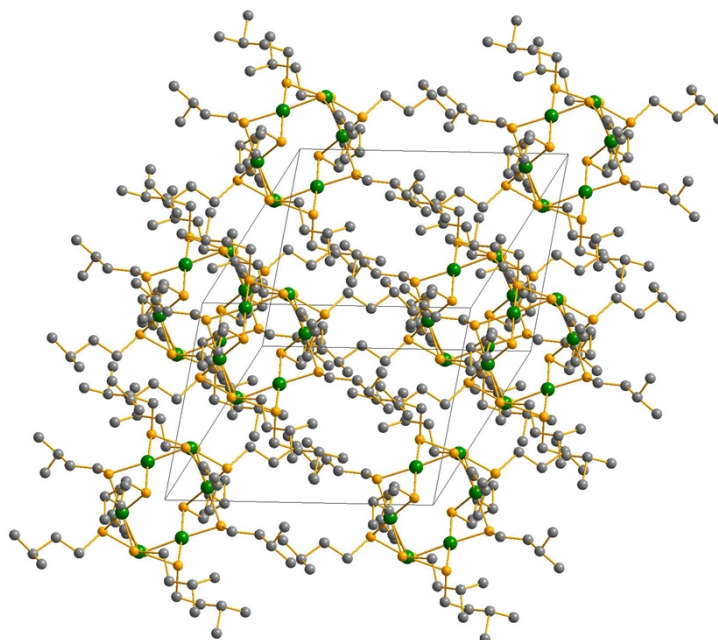

**Fig. S4** Crystal packing pattern of **2**. The hydrogen atoms are omitted for clarity (Ni green, S yellow, C gray).

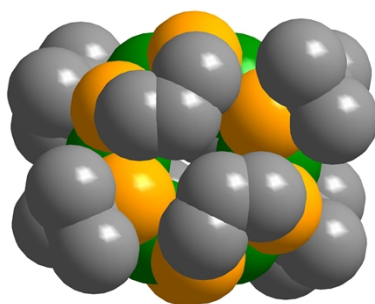

**Fig. S5** Molecular view of **4** in space filling model. The hydrogen atoms are omitted for clarity (Ni green, S yellow, C gray).

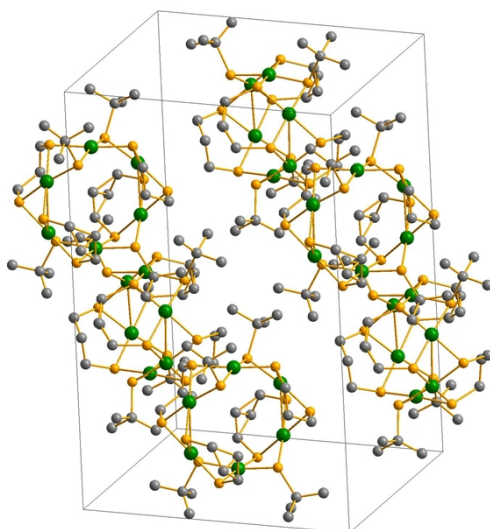

**Fig. S6** Crystal packing pattern of **4**. The hydrogen atoms are omitted for clarity (Ni green, S yellow, C gray).

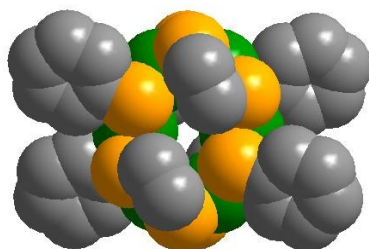

**Fig. S7** Molecular view of **5** in space filling model. The hydrogen atoms and the distorted carbon are omitted for clarity (Ni green, S yellow, C gray).

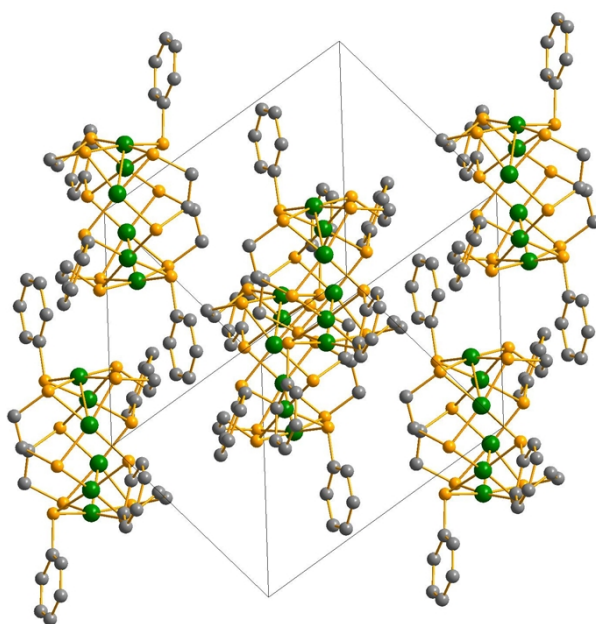

**Fig. S8** Crystal packing pattern of **5**. The hydrogen atoms are omitted for clarity (Ni green, S yellow, C gray).

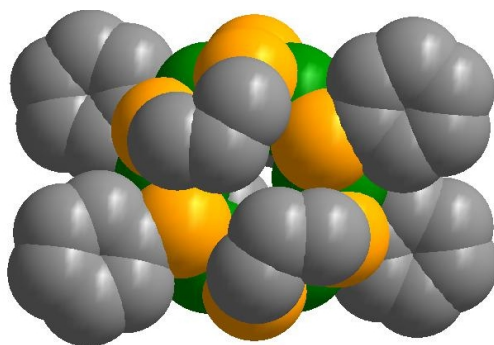

**Fig. S9** Molecular view of **6** in space filling model. The hydrogen atoms are omitted for clarity (Ni green, S yellow, C gray).

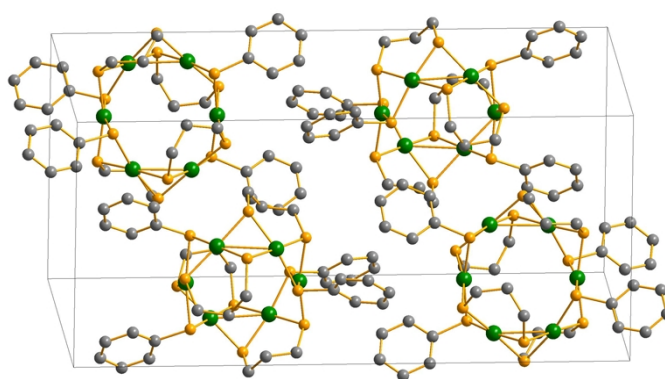

**Fig. S10** Crystal packing pattern of **6**. The hydrogen atoms are omitted for clarity (Ni green, S yellow, C gray).

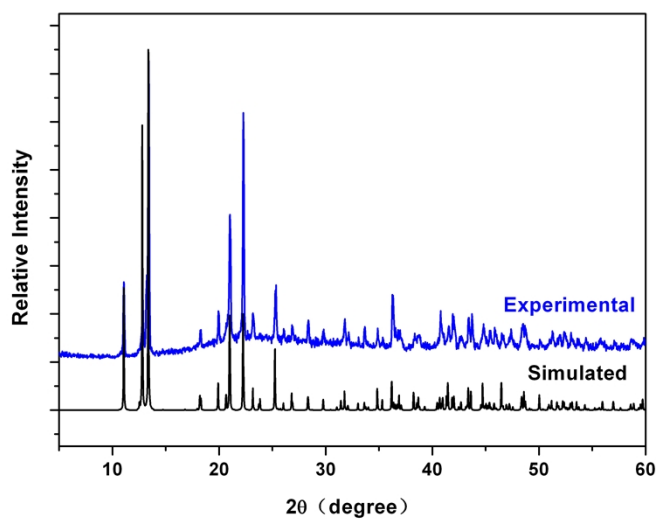

**Fig. S11** Powder X-ray diffractions for simulated and experimental **1**.

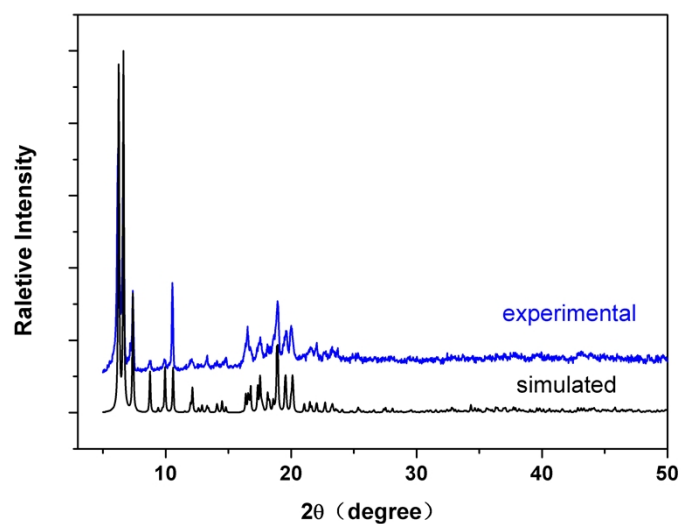

**Fig. S12** Powder X-ray diffractions for simulated and experimental 2.

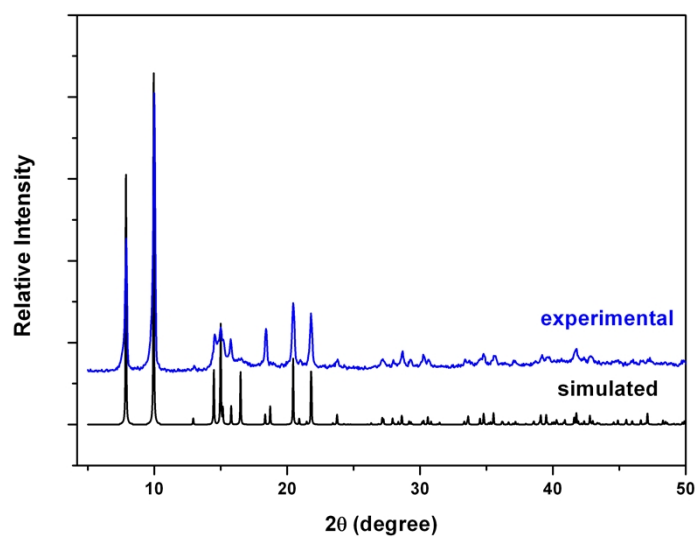

**Fig. S13** Powder X-ray diffractions for simulated and experimental 3.

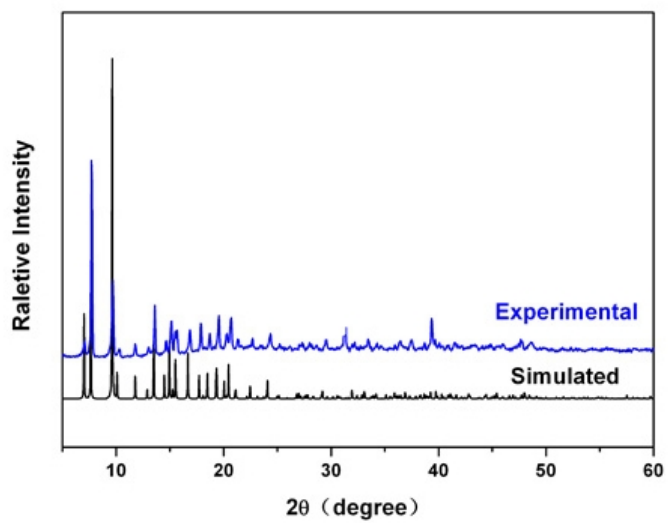

**Fig. S14** Powder X-ray diffractions for simulated and experimental 4.

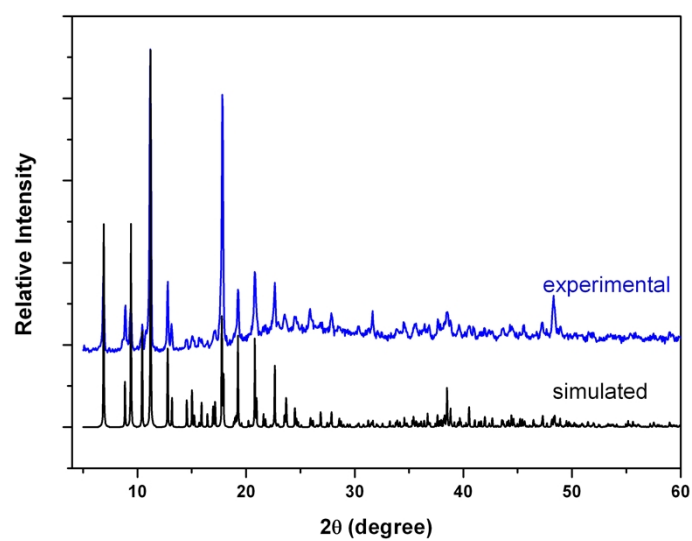

**Fig. S15** Powder X-ray diffractions for simulated and experimental 5.

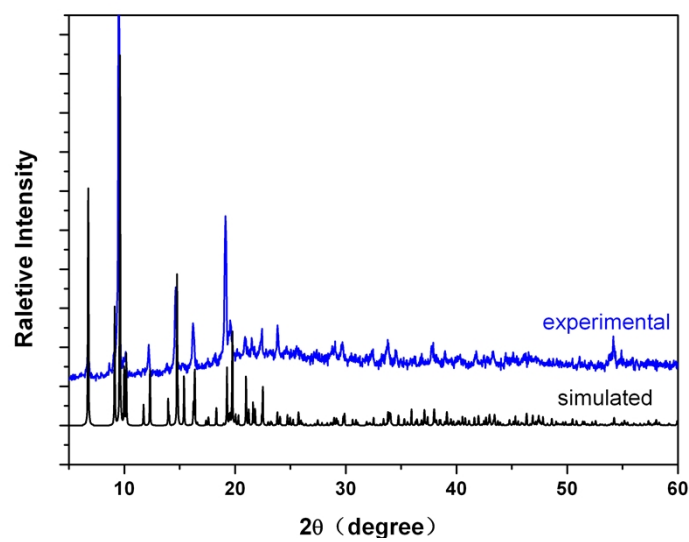

**Fig. S16** Powder X-ray diffractions for simulated and experimental 6.



Table S1 the crystal data and structure refinements for culster **1**.

| Compound                                              | <b>1</b>                                                          |
|-------------------------------------------------------|-------------------------------------------------------------------|
| Empirical formula                                     | C <sub>10</sub> H <sub>20</sub> Ni <sub>5</sub> S <sub>10</sub>   |
| Formula weight (g/mol)                                | 754.41                                                            |
| Crystal system                                        | Monoclinic                                                        |
| Space group                                           | C2/c                                                              |
| Crystal appearance                                    | black needle                                                      |
| Crystal Size (mm)                                     | 0.25 × 0.10 × 0.06                                                |
| <i>a</i> (Å)                                          | 10.906(3)                                                         |
| <i>b</i> (Å)                                          | 14.095(3)                                                         |
| <i>c</i> (Å)                                          | 14.294(3)                                                         |
| $\alpha$ (°)                                          | 90                                                                |
| $\beta$ (°)                                           | 105.160(12)                                                       |
| $\gamma$ (°)                                          | 90                                                                |
| <i>V</i> (Å <sup>3</sup> )                            | 2120.9(9)                                                         |
| <i>Z</i>                                              | 4                                                                 |
| D <sub>c</sub> (Mg/m <sup>3</sup> )                   | 2.363                                                             |
| $\mu$ (mm <sup>-1</sup> )                             | 5.337                                                             |
| F(000)                                                | 1520                                                              |
| Temperature (K)                                       | 293(2)                                                            |
| Wavelength (Å)                                        | 0.71073                                                           |
| $\theta$ range (°)                                    | 2.41 -27.51                                                       |
| <i>h</i> , <i>k</i> and <i>l</i> ranges               | -12 ≤ <i>h</i> ≤ 14<br>-18 ≤ <i>k</i> ≤ 17<br>-18 ≤ <i>l</i> ≤ 17 |
| Reflections measured                                  | 8227                                                              |
| Independent reflections                               | 2439                                                              |
| Observed Reflection ( <i>I</i> > 2σ( <i>I</i> ))      | 1855                                                              |
| <i>R</i> <sub>int</sub>                               | 0.0574                                                            |
| Min./max. trans.                                      | 0.6779 and 1.0000                                                 |
| Goodness-of-fit on <i>F</i> <sup>2</sup>              | 1.032                                                             |
| Final <i>R</i> * indices ( <i>I</i> > 2σ( <i>I</i> )) | <i>R</i> 1 = 0.0413, <i>wR</i> 2 = 0.0713                         |
| <i>R</i> indices (all)                                | <i>R</i> 1 = 0.0656, <i>wR</i> 2 = 0.0792                         |
| Largest diff. peak and hole                           | 0.588 and -0.501                                                  |

$$R = \sum(|F_o| - |F_c|) / \sum|F_o|, wR = \{\sum w[(F_o^2 - F_c^2)^2] / \sum w[(F_o^2)^2]\}^{1/2}$$

Table S2 the crystal data and structure refinements for culster 2.

| Compound                                              | 2                                                                  |
|-------------------------------------------------------|--------------------------------------------------------------------|
| Empirical formula                                     | C <sub>60</sub> H <sub>132</sub> Ni <sub>6</sub> S <sub>12</sub>   |
| Formula weight (g/mol)                                | 1590.64                                                            |
| Crystal system                                        | triclinic                                                          |
| Space group                                           | <i>P</i> -1                                                        |
| Crystal appearance                                    | black cuboid                                                       |
| Crystal Size (mm)                                     | 0.25 × 0.20 × 0.20                                                 |
| <i>a</i> (Å)                                          | 10.700(8)                                                          |
| <i>b</i> (Å)                                          | 14.844(10)                                                         |
| <i>c</i> (Å)                                          | 15.567(10)                                                         |
| $\alpha$ (°)                                          | 66.82(6)                                                           |
| $\beta$ (°)                                           | 75.32(6)                                                           |
| $\gamma$ (°)                                          | 72.64(6)                                                           |
| <i>V</i> (Å <sup>3</sup> )                            | 2143(3)                                                            |
| <i>Z</i>                                              | 1                                                                  |
| D <sub>c</sub> (Mg/m <sup>3</sup> )                   | 1.232                                                              |
| $\mu$ (mm <sup>-1</sup> )                             | 1.613                                                              |
| F(000)                                                | 852                                                                |
| Temperature (K)                                       | 293(2)                                                             |
| Wavelength (Å)                                        | 0.71073                                                            |
| $\theta$ range (°)                                    | 2.76 -25.00                                                        |
| <i>h</i> , <i>k</i> and <i>l</i> ranges               | -12 ≤ <i>h</i> ≤ 12<br>-178 ≤ <i>k</i> ≤ 15<br>-18 ≤ <i>l</i> ≤ 18 |
| Reflections measured                                  | 13364                                                              |
| Independent reflections                               | 7359                                                               |
| Observed Reflection ( <i>I</i> > 2σ( <i>I</i> ))      | 3464                                                               |
| <i>R</i> <sub>int</sub>                               | 0.0580                                                             |
| Min./max. trans.                                      | 0.6302 and 1.0000                                                  |
| Goodness-of-fit on <i>F</i> <sup>2</sup>              | 1.048                                                              |
| Final <i>R</i> * indices ( <i>I</i> > 2σ( <i>I</i> )) | <i>R</i> 1 = 0.0821, <i>wR</i> 2 = 0.1361                          |
| <i>R</i> indices (all)                                | <i>R</i> 1 = 0.1673, <i>wR</i> 2 = 0.1640                          |
| Largest diff. peak and hole                           | 0.493 and -0.346                                                   |

$$R = \frac{\sum(|F_o| - |F_c|)}{\sum|F_o|}, wR = \left\{ \frac{\sum w[(F_o^2 - F_c^2)^2]}{\sum w[(F_o^2)^2]} \right\}^{1/2}$$

Table S3 the crystal data and structure refinements for culster 4.

| Compound                                              | 4                                                                 |
|-------------------------------------------------------|-------------------------------------------------------------------|
| Empirical formula                                     | C <sub>28</sub> H <sub>60</sub> Ni <sub>6</sub> S <sub>12</sub>   |
| Formula weight (g/mol)                                | 1133.74                                                           |
| Crystal system                                        | Orthorhombic                                                      |
| Space group                                           | C222 <sub>1</sub>                                                 |
| Crystal appearance                                    | black needle                                                      |
| Crystal Size (mm)                                     | 0.35 × 0.15 × 0.15                                                |
| <i>a</i> (Å)                                          | 15.028(17)                                                        |
| <i>b</i> (Å)                                          | 23.16(2)                                                          |
| <i>c</i> (Å)                                          | 13.417(14)                                                        |
| $\alpha$ (°)                                          | 90                                                                |
| $\beta$ (°)                                           | 90                                                                |
| $\gamma$ (°)                                          | 90                                                                |
| <i>V</i> (Å <sup>3</sup> )                            | 4670(9)                                                           |
| <i>Z</i>                                              | 4                                                                 |
| <i>D<sub>c</sub></i> (Mg/m <sup>3</sup> )             | 1.612                                                             |
| $\mu$ (mm <sup>-1</sup> )                             | 2.926                                                             |
| <i>F</i> (000)                                        | 2352                                                              |
| Temperature (K)                                       | 293(2)                                                            |
| Wavelength (Å)                                        | 0.71073                                                           |
| $\theta$ range (°)                                    | 2.22-27.27                                                        |
| <i>h</i> , <i>k</i> and <i>l</i> ranges               | -19 ≤ <i>h</i> ≤ 16<br>-28 ≤ <i>k</i> ≤ 29<br>-17 ≤ <i>l</i> ≤ 17 |
| Reflections measured                                  | 17500                                                             |
| Independent reflections                               | 5240                                                              |
| Observed Reflection ( <i>I</i> > 2σ( <i>I</i> ))      | 3625                                                              |
| <i>R</i> <sub>int</sub>                               | 0.0533                                                            |
| Min./max. trans.                                      | 0.5712 and 1.0000                                                 |
| Goodness-of-fit on <i>F</i> <sup>2</sup>              | 1.064                                                             |
| Final <i>R</i> * indices ( <i>I</i> > 2σ( <i>I</i> )) | <i>R</i> 1 = 0.0754, <i>wR</i> 2 = 0.1878                         |
| <i>R</i> indices (all)                                | <i>R</i> 1 = 0.1030, <i>wR</i> 2 = 0.2100                         |
| Largest diff. peak and hole                           | 0.881 and -0.941                                                  |

$$R = \Sigma(|F_o| - |F_c|) / \Sigma|F_o|, wR = \{\Sigma w[(F_o^2 - F_c^2)^2] / \Sigma w[(F_o^2)^2]\}^{1/2}$$

Table S4 the crystal data and structure refinements for culster 5.

| Compound                                              | 5                                                                 |
|-------------------------------------------------------|-------------------------------------------------------------------|
| Empirical formula                                     | C <sub>32</sub> H <sub>36</sub> Ni <sub>6</sub> S <sub>12</sub>   |
| Formula weight (g/mol)                                | 1157.59                                                           |
| Crystal system                                        | Monoclinic                                                        |
| Space group                                           | <i>P2/n</i>                                                       |
| Crystal appearance                                    | black cuboid                                                      |
| Crystal Size (mm)                                     | 0.20 × 0.20 × 0.20                                                |
| <i>a</i> (Å)                                          | 11.621(2)                                                         |
| <i>b</i> (Å)                                          | 12.8025(18)                                                       |
| <i>c</i> (Å)                                          | 14.234(2)                                                         |
| $\alpha$ (°)                                          | 90                                                                |
| $\beta$ (°)                                           | 103.641(10)                                                       |
| $\gamma$ (°)                                          | 90                                                                |
| <i>V</i> (Å <sup>3</sup> )                            | 2058.0(6)                                                         |
| <i>Z</i>                                              | 2                                                                 |
| <i>D<sub>c</sub></i> (Mg/m <sup>3</sup> )             | 1.868                                                             |
| $\mu$ (mm <sup>-1</sup> )                             | 3.323                                                             |
| <i>F</i> (000)                                        | 1176                                                              |
| Temperature (K)                                       | 293(2)                                                            |
| Wavelength (Å)                                        | 0.71073                                                           |
| $\theta$ range (°)                                    | 2.04 -27.51                                                       |
| <i>h</i> , <i>k</i> and <i>l</i> ranges               | -15 ≤ <i>h</i> ≤ 10<br>-16 ≤ <i>k</i> ≤ 16<br>-16 ≤ <i>l</i> ≤ 18 |
| Reflections measured                                  | 15849                                                             |
| Independent reflections                               | 4724                                                              |
| Observed Reflection ( <i>I</i> > 2σ( <i>I</i> ))      | 3422                                                              |
| <i>R</i> <sub>int</sub>                               | 0.0476                                                            |
| Min./max. trans.                                      | 0.6777 and 1.0000                                                 |
| Goodness-of-fit on <i>F</i> <sup>2</sup>              | 1.144                                                             |
| Final <i>R</i> * indices ( <i>I</i> > 2σ( <i>I</i> )) | <i>R</i> 1 = 0.0547, <i>wR</i> 2 = 0.1374                         |
| <i>R</i> indices (all)                                | <i>R</i> 1 = 0.0816, <i>wR</i> 2 = 0.1659                         |
| Largest diff. peak and hole                           | 1.176 and -0.889                                                  |

$$R = \sum(|F_o| - |F_c|) / \sum|F_o|, wR = \{\sum w[(F_o^2 - F_c^2)^2] / \sum w[(F_o^2)^2]\}^{1/2}$$

Table S5 the crystal data and structure refinements for culster 6.

| Compound                                              | 6                                                               |
|-------------------------------------------------------|-----------------------------------------------------------------|
| Empirical formula                                     | C <sub>36</sub> H <sub>44</sub> Ni <sub>6</sub> S <sub>12</sub> |
| Formula weight (g/mol)                                | 1213.69                                                         |
| Crystal system                                        | Orthorhombic                                                    |
| Space group                                           | <i>Pccn</i>                                                     |
| Crystal appearance                                    | Black block                                                     |
| Crystal Size (mm)                                     | 0.20×0.15×0.15                                                  |
| <i>a</i> (Å)                                          | 11.997(7)                                                       |
| <i>b</i> (Å)                                          | 14.360(9)                                                       |
| <i>c</i> (Å)                                          | 26.228(16)                                                      |
| $\alpha$ (°)                                          | 90                                                              |
| $\beta$ (°)                                           | 90                                                              |
| $\gamma$ (°)                                          | 90                                                              |
| <i>V</i> (Å <sup>3</sup> )                            | 4518(5)                                                         |
| <i>Z</i>                                              | 4                                                               |
| <i>D<sub>c</sub></i> (Mg/m <sup>3</sup> )             | 1.784                                                           |
| $\mu$ (mm <sup>-1</sup> )                             | 3.032                                                           |
| <i>F</i> (000)                                        | 2480                                                            |
| Temperature (K)                                       | 293(2)                                                          |
| Wavelength (Å)                                        | 0.71073                                                         |
| $\theta$ range (°)                                    | 2.10-27.52                                                      |
| <i>h</i> , <i>k</i> and <i>l</i> ranges               | -14≤ <i>h</i> ≤15<br>-18≤ <i>k</i> ≤18<br>-34≤ <i>l</i> ≤34     |
| Reflections measured                                  | 33264                                                           |
| Independent reflections                               | 5172                                                            |
| Observed Reflection( <i>I</i> > 2σ( <i>I</i> ))       | 3464                                                            |
| <i>R</i> <sub>int</sub>                               | 0.0875                                                          |
| Min./max. trans.                                      | 0.8877 and 1.0000                                               |
| Goodness-of-fit on <i>F</i> <sup>2</sup>              | 1.095                                                           |
| Final <i>R</i> * indices ( <i>I</i> > 2σ( <i>I</i> )) | <i>R</i> 1 = 0.0697, <i>wR</i> 2 = 0.1708                       |
| <i>R</i> indices (all)                                | <i>R</i> 1 = 0.1122, <i>wR</i> 2 = 0.1998                       |
| Largest diff. peak and hole                           | 0.878 and -0.632                                                |

$$R = \sum(|F_o| - |F_c|) / \sum|F_o|, wR = \{\sum w[(F_o^2 - F_c^2)^2] / \sum w[(F_o^2)^2]\}^{1/2}$$

Table S6 the selected bond lengths (Å) and angles(°) for **1**.

| Bond                 | Dist.(Å)   | Bond                 | Dist.(Å)    |
|----------------------|------------|----------------------|-------------|
| Ni(1)-S(1)           | 2.1567(12) | Ni(3)-S(3)           | 2.2066(13)  |
| Ni(1)-S(1)#1         | 2.1567(12) | Ni(3)-S(5)#1         | 2.2107(13)  |
| Ni(1)-S(2)           | 2.1629(12) | Ni(3)-S(4)           | 2.2169(13)  |
| Ni(1)-S(2)#1         | 2.1629(12) | Ni(3)-Ni(3)#1        | 2.7409(13)  |
| Ni(1)-Ni(2)          | 2.7903(8)  | S(1)-C(1)            | 1.832(5)    |
| Ni(2)-S(3)           | 2.2034(13) | S(1)-Ni(2)#1         | 2.2354(13)  |
| Ni(2)-S(2)           | 2.2073(12) | S(2)-C(2)            | 1.828(4)    |
| Ni(2)-S(4)           | 2.2068(13) | S(3)-C(3)            | 1.823(5)    |
| Ni(2)-S(1)#1         | 2.2354(13) | S(4)-C(4)            | 1.838(5)    |
| Ni(2)-Ni(3)          | 2.7426(9)  | S(5)-C(5)            | 1.819(5)    |
| Ni(3)-S(5)           | 2.2012(13) | S(5)-Ni(3)#1         | 2.2107(13)  |
| Angle                | (°)        | Angle                | (°)         |
| S(1)-Ni(1)-S(1)#1    | 162.66(7)  | S(5)-Ni(3)-S(3)      | 97.24(5)    |
| S(1)-Ni(1)-S(2)      | 94.02(5)   | S(5)-Ni(3)-S(5)#1    | 82.05(6)    |
| S(1)#1-Ni(1)-S(2)    | 85.28(5)   | S(3)-Ni(3)-S(5)#1    | 175.00(5)   |
| S(1)-Ni(1)-S(2)#1    | 85.28(5)   | S(5)-Ni(3)-S(4)      | 178.35(5)   |
| S(1)#1-Ni(1)-S(2)#1  | 94.02(5)   | S(3)-Ni(3)-S(4)      | 81.84(5)    |
| S(2)-Ni(1)-S(2)#1    | 175.37(7)  | S(5)#1-Ni(3)-S(4)    | 98.74(5)    |
| S(1)-Ni(1)-Ni(2)     | 115.28(4)  | S(5)-Ni(3)-Ni(3)#1   | 51.75(4)    |
| S(1)#1-Ni(1)-Ni(2)   | 51.82(3)   | S(3)-Ni(3)-Ni(3)#1   | 124.44(4)   |
| S(2)-Ni(1)-Ni(2)     | 51.03(3)   | S(5)#1-Ni(3)-Ni(3)#1 | 51.44(4)    |
| S(1)-Ni(1)-Ni(2)#1   | 51.82(3)   | S(5)-Ni(3)-Ni(2)     | 126.85(4)   |
| S(1)#1-Ni(1)-Ni(2)#1 | 115.28(4)  | S(3)-Ni(3)-Ni(2)     | 51.49(3)    |
| S(2)-Ni(1)-Ni(2)#1   | 125.30(4)  | S(5)#1-Ni(3)-Ni(2)   | 125.24(4)   |
| S(2)#1-Ni(1)-Ni(2)#1 | 51.03(3)   | S(4)-Ni(3)-Ni(2)     | 51.52(3)    |
| Ni(2)-Ni(1)-Ni(2)#1  | 101.36(4)  | Ni(3)#1-Ni(3)-Ni(2)  | 106.690(17) |
| S(3)-Ni(2)-S(2)      | 98.79(5)   | C(1)-S(1)-Ni(1)      | 98.78(16)   |
| S(3)-Ni(2)-S(4)      | 82.15(5)   | C(1)-S(1)-Ni(2)#1    | 107.03(16)  |
| S(2)-Ni(2)-S(4)      | 176.26(5)  | Ni(1)-S(1)-Ni(2)#1   | 78.86(4)    |
| S(3)-Ni(2)-S(1)#1    | 172.47(5)  | C(2)-S(2)-Ni(1)      | 102.69(16)  |
| S(2)-Ni(2)-S(1)#1    | 82.39(5)   | C(2)-S(2)-Ni(2)      | 113.69(16)  |
| S(4)-Ni(2)-S(1)#1    | 97.16(5)   | Ni(1)-S(2)-Ni(2)     | 79.35(4)    |
| S(3)-Ni(2)-Ni(3)     | 51.60(4)   | C(3)-S(3)-Ni(2)      | 102.55(18)  |
| S(2)-Ni(2)-Ni(3)     | 131.40(4)  | C(3)-S(3)-Ni(3)      | 93.78(17)   |
| S(4)-Ni(2)-Ni(3)     | 51.85(4)   | Ni(2)-S(3)-Ni(3)     | 76.91(5)    |
| S(1)#1-Ni(2)-Ni(3)   | 122.38(4)  | C(4)-S(4)-Ni(2)      | 96.10(16)   |
| S(3)-Ni(2)-Ni(1)     | 126.39(4)  | C(4)-S(4)-Ni(3)      | 99.70(17)   |
| S(2)-Ni(2)-Ni(1)     | 49.62(3)   | Ni(2)-S(4)-Ni(3)     | 76.63(4)    |
| S(4)-Ni(2)-Ni(1)     | 132.43(4)  | C(5)-S(5)-Ni(3)      | 95.57(15)   |

|                    |           |                    |            |
|--------------------|-----------|--------------------|------------|
| S(1)#1-Ni(2)-Ni(1) | 49.32(3)  | C(5)-S(5)-Ni(3)#1  | 101.10(16) |
| Ni(3)-Ni(2)-Ni(1)  | 112.61(3) | Ni(3)-S(5)-Ni(3)#1 | 76.81(5)   |

**Symmetry transformations used to generate equivalent atoms: #1 -x, y, -z+1/2**

Table S7 the selected bond lengths (Å) and angles(°) for **2**.

| Bond                 | Dist.(Å)   | Bond                | Dist.(Å)   |
|----------------------|------------|---------------------|------------|
| Ni(1)-S(6)#1         | 2.193(3)   | Ni(3)-S(6)          | 2.206(3)   |
| Ni(1)-S(2)           | 2.193(3)   | Ni(3)-S(5)          | 2.207(3)   |
| Ni(1)-S(1)           | 2.202(3)   | Ni(3)-Ni(1)#1       | 2.856(3)   |
| Ni(1)-S(5)#1         | 2.215(3)   | S(1)-C(1)           | 1.794(12)  |
| Ni(1)-Ni(3)#1        | 2.856(3)   | S(2)-C(6)           | 1.833(10)  |
| Ni(2)-S(3)           | 2.197(3)   | S(3)-C(11)          | 1.799(9)   |
| Ni(2)-S(2)           | 2.201(3)   | S(4)-C(16)          | 1.835(10)  |
| Ni(2)-S(4)           | 2.201(3)   | S(5)-C(21)          | 1.818(9)   |
| Ni(2)-S(1)           | 2.214(3)   | S(5)-Ni(1)#1        | 2.215(3)   |
| Ni(2)-Ni(3)          | 2.929(2)   | S(6)-C(26)          | 1.834(10)  |
| Ni(3)-S(4)           | 2.200(3)   | S(6)-Ni(1)#1        | 2.193(3)   |
| Ni(3)-S(3)           | 2.201(3)   |                     |            |
| Angle                | (°)        | Angle               | (°)        |
| S(6)#1-Ni(1)-S(2)    | 177.37(11) | S(3)-Ni(3)-Ni(1)#1  | 130.61(10) |
| S(6)#1-Ni(1)-S(1)    | 97.93(13)  | S(6)-Ni(3)-Ni(1)#1  | 49.33(9)   |
| S(2)-Ni(1)-S(1)      | 81.97(13)  | S(5)-Ni(3)-Ni(1)#1  | 49.91(9)   |
| S(6)#1-Ni(1)-S(5)#1  | 82.13(13)  | S(4)-Ni(3)-Ni(2)    | 48.30(9)   |
| S(2)-Ni(1)-S(5)#1    | 98.36(13)  | S(3)-Ni(3)-Ni(2)    | 48.17(9)   |
| S(1)-Ni(1)-S(5)#1    | 171.53(11) | S(6)-Ni(3)-Ni(2)    | 131.77(10) |
| S(6)#1-Ni(1)-Ni(3)#1 | 49.71(9)   | S(5)-Ni(3)-Ni(2)    | 125.28(10) |
| S(2)-Ni(1)-Ni(3)#1   | 132.38(10) | Ni(1)#1-Ni(3)-Ni(2) | 114.83(7)  |
| S(1)-Ni(1)-Ni(3)#1   | 124.49(11) | C(1)-S(1)-Ni(1)     | 107.4(5)   |
| S(5)#1-Ni(1)-Ni(3)#1 | 49.65(9)   | C(1)-S(1)-Ni(2)     | 104.1(4)   |
| S(3)-Ni(2)-S(2)      | 175.25(11) | Ni(1)-S(1)-Ni(2)    | 85.93(12)  |
| S(3)-Ni(2)-S(4)      | 81.80(12)  | C(6)-S(2)-Ni(1)     | 114.3(4)   |
| S(2)-Ni(2)-S(4)      | 99.10(12)  | C(6)-S(2)-Ni(2)     | 114.1(4)   |
| S(3)-Ni(2)-S(1)      | 98.14(12)  | Ni(1)-S(2)-Ni(2)    | 86.47(12)  |
| S(2)-Ni(2)-S(1)      | 81.53(12)  | C(11)-S(3)-Ni(2)    | 114.0(3)   |
| S(4)-Ni(2)-S(1)      | 173.20(11) | C(11)-S(3)-Ni(3)    | 114.6(3)   |
| S(3)-Ni(2)-Ni(3)     | 48.31(8)   | Ni(2)-S(3)-Ni(3)    | 83.51(11)  |
| S(2)-Ni(2)-Ni(3)     | 135.28(10) | C(16)-S(4)-Ni(3)    | 104.9(4)   |
| S(4)-Ni(2)-Ni(3)     | 48.27(8)   | C(16)-S(4)-Ni(2)    | 105.8(4)   |
| S(1)-Ni(2)-Ni(3)     | 127.21(10) | Ni(3)-S(4)-Ni(2)    | 83.43(12)  |
| S(4)-Ni(3)-S(3)      | 81.72(12)  | C(21)-S(5)-Ni(3)    | 106.9(3)   |
| S(4)-Ni(3)-S(6)      | 98.27(13)  | C(21)-S(5)-Ni(1)#1  | 106.8(4)   |
| S(3)-Ni(3)-S(6)      | 179.92(12) | Ni(3)-S(5)-Ni(1)#1  | 80.45(12)  |
| S(4)-Ni(3)-S(5)      | 170.68(12) | C(26)-S(6)-Ni(1)#1  | 114.8(4)   |
| S(3)-Ni(3)-S(5)      | 97.96(13)  | C(26)-S(6)-Ni(3)    | 113.6(3)   |
| S(6)-Ni(3)-S(5)      | 82.03(12)  | Ni(1)#1-S(6)-Ni(3)  | 80.96(12)  |

S(4)-Ni(3)-Ni(1)#1

123.83(11)

**Symmetry transformations used to generate equivalent atoms: #1 -x+2, -y+2, -z**

Table S8 the selected bond lengths (Å) and angles(°) for 4.

| Bond                | Dist.(Å)   | Bond                | Dist.(Å)   |
|---------------------|------------|---------------------|------------|
| S(1)-C(1)           | 1.899(11)  | S(5)-C(10)          | 1.858(18)  |
| S(1)-Ni(2)          | 2.209(3)   | S(5)-Ni(3)          | 2.195(4)   |
| S(1)-Ni(1)          | 2.231(3)   | S(5)-Ni(4)          | 2.212(4)   |
| S(2)-C(5)           | 1.834(10)  | S(6)-C(11)          | 1.877(11)  |
| S(2)-Ni(2)          | 2.199(3)   | S(6)-Ni(4)          | 2.224(4)   |
| S(2)-Ni(1)          | 2.229(3)   | S(6)-Ni(3)          | 2.225(3)   |
| S(3)-C(8)           | 1.821(14)  | Ni(1)-S(2)#1        | 2.229(3)   |
| S(3)-Ni(3)          | 2.211(3)   | Ni(1)-S(1)#1        | 2.231(3)   |
| S(3)-Ni(2)          | 2.244(4)   | Ni(2)-Ni(3)         | 2.857(3)   |
| S(4)-C(7)           | 1.826(12)  | Ni(4)-S(5)#1        | 2.212(4)   |
| S(4)-Ni(2)          | 2.206(3)   | Ni(4)-S(6)#1        | 2.224(4)   |
| S(4)-Ni(3)          | 2.235(4)   |                     |            |
| Angle               | (°)        | Angle               | (°)        |
| C(1)-S(1)-Ni(2)     | 111.6(4)   | S(2)-Ni(2)-S(1)     | 82.80(11)  |
| C(1)-S(1)-Ni(1)     | 112.9(4)   | S(4)-Ni(2)-S(1)     | 172.43(11) |
| Ni(2)-S(1)-Ni(1)    | 86.11(9)   | S(2)-Ni(2)-S(3)     | 178.78(12) |
| C(5)-S(2)-Ni(2)     | 113.6(4)   | S(4)-Ni(2)-S(3)     | 78.35(12)  |
| C(5)-S(2)-Ni(1)     | 114.4(4)   | S(1)-Ni(2)-S(3)     | 97.97(12)  |
| Ni(2)-S(2)-Ni(1)    | 86.38(10)  | S(2)-Ni(2)-Ni(3)    | 130.69(10) |
| C(8)-S(3)-Ni(3)     | 114.7(5)   | S(4)-Ni(2)-Ni(3)    | 50.42(9)   |
| C(8)-S(3)-Ni(2)     | 115.6(5)   | S(1)-Ni(2)-Ni(3)    | 122.24(9)  |
| Ni(3)-S(3)-Ni(2)    | 79.75(12)  | S(3)-Ni(2)-Ni(3)    | 49.62(9)   |
| C(7)-S(4)-Ni(2)     | 112.6(3)   | S(5)-Ni(3)-S(3)     | 99.98(14)  |
| C(7)-S(4)-Ni(3)     | 113.9(4)   | S(5)-Ni(3)-S(6)     | 83.08(12)  |
| Ni(2)-S(4)-Ni(3)    | 80.05(13)  | S(3)-Ni(3)-S(6)     | 172.50(12) |
| C(10)-S(5)-Ni(3)    | 114.7(5)   | S(5)-Ni(3)-S(4)     | 178.22(12) |
| C(10)-S(5)-Ni(4)    | 114.4(5)   | S(3)-Ni(3)-S(4)     | 78.44(12)  |
| Ni(3)-S(5)-Ni(4)    | 86.29(11)  | S(6)-Ni(3)-S(4)     | 98.59(12)  |
| C(11)-S(6)-Ni(4)    | 111.9(4)   | S(5)-Ni(3)-Ni(2)    | 129.99(11) |
| C(11)-S(6)-Ni(3)    | 116.2(4)   | S(3)-Ni(3)-Ni(2)    | 50.63(9)   |
| Ni(4)-S(6)-Ni(3)    | 85.26(11)  | S(6)-Ni(3)-Ni(2)    | 122.32(9)  |
| S(2)-Ni(1)-S(2)#1   | 175.64(14) | S(4)-Ni(3)-Ni(2)    | 49.53(9)   |
| S(2)-Ni(1)-S(1)     | 81.64(10)  | S(5)-Ni(4)-S(5)#1   | 175.71(16) |
| S(2)#1-Ni(1)-S(1)   | 98.88(10)  | S(5)-Ni(4)-S(6)#1   | 97.75(12)  |
| S(2)-Ni(1)-S(1)#1   | 98.88(10)  | S(5)#1-Ni(4)-S(6)#1 | 82.70(11)  |
| S(2)#1-Ni(1)-S(1)#1 | 81.64(10)  | S(5)-Ni(4)-S(6)     | 82.70(11)  |
| S(1)-Ni(1)-S(1)#1   | 166.43(14) | S(5)#1-Ni(4)-S(6)   | 97.75(12)  |
| S(2)-Ni(2)-S(4)     | 101.00(12) | S(6)#1-Ni(4)-S(6)   | 167.97(14) |

**Symmetry transformations used to generate equivalent atoms: #1 -x, y, -z-1/2**



Table S9 the selected bond lengths (Å) and angles(°) for **5**.

| Bond                 | Dist.(Å)   | Bond               | Dist.(Å)   |
|----------------------|------------|--------------------|------------|
| Ni(1)-S(5)#1         | 2.2028(14) | Ni(3)-Ni(4)        | 2.9895(9)  |
| Ni(1)-S(5)           | 2.2028(14) | Ni(4)-S(7)#1       | 2.1545(19) |
| Ni(1)-S(8)           | 2.2277(15) | Ni(4)-S(10)        | 2.1928(18) |
| Ni(1)-S(8)#1         | 2.2277(15) | Ni(4)-S(9)         | 2.2061(17) |
| Ni(2)-S(5)           | 2.1709(16) | Ni(4)-S(6)         | 2.2091(18) |
| Ni(2)-S(6)           | 2.1873(17) | S(5)-C(10)         | 1.826(6)   |
| Ni(2)-S(10)          | 2.1931(18) | S(6)-C(9)          | 1.809(7)   |
| Ni(2)-S(8)#1         | 2.2018(17) | S(7)-C(8)          | 1.884(10)  |
| Ni(2)-Ni(4)          | 2.6903(11) | S(7)-Ni(4)#1       | 2.1545(19) |
| Ni(3)-S(7)           | 2.1974(16) | S(8)-C(5)          | 1.776(6)   |
| Ni(3)-S(7)#1         | 2.1974(16) | S(8)-Ni(2)#1       | 2.2018(17) |
| Ni(3)-S(9)#1         | 2.2322(16) | S(9)-C(6)          | 1.791(6)   |
| Ni(3)-S(9)           | 2.2322(16) | S(10)-C(20)        | 1.778(8)   |
| Ni(3)-Ni(4)#1        | 2.9895(9)  |                    |            |
| Angle                | (°)        | Angle              | (°)        |
| S(5)#1-Ni(1)-S(5)    | 175.26(9)  | S(7)#1-Ni(4)-Ni(2) | 120.16(6)  |
| S(5)#1-Ni(1)-S(8)    | 84.62(5)   | S(10)-Ni(4)-Ni(2)  | 52.17(5)   |
| S(5)-Ni(1)-S(8)      | 95.66(5)   | S(9)-Ni(4)-Ni(2)   | 122.95(5)  |
| S(5)#1-Ni(1)-S(8)#1  | 95.66(5)   | S(6)-Ni(4)-Ni(2)   | 51.91(5)   |
| S(5)-Ni(1)-S(8)#1    | 84.62(5)   | S(7)#1-Ni(4)-Ni(3) | 47.21(5)   |
| S(8)-Ni(1)-S(8)#1    | 173.24(9)  | S(10)-Ni(4)-Ni(3)  | 124.82(7)  |
| S(5)-Ni(2)-S(6)      | 90.93(6)   | S(9)-Ni(4)-Ni(3)   | 48.03(4)   |
| S(5)-Ni(2)-S(10)     | 169.53(7)  | S(6)-Ni(4)-Ni(3)   | 136.77(5)  |
| S(6)-Ni(2)-S(10)     | 80.25(7)   | Ni(2)-Ni(4)-Ni(3)  | 111.73(3)  |
| S(5)-Ni(2)-S(8)#1    | 86.01(6)   | C(10)-S(5)-Ni(2)   | 98.5(2)    |
| S(6)-Ni(2)-S(8)#1    | 171.96(7)  | C(10)-S(5)-Ni(1)   | 109.3(2)   |
| S(10)-Ni(2)-S(8)#1   | 101.98(7)  | Ni(2)-S(5)-Ni(1)   | 86.69(6)   |
| S(5)-Ni(2)-Ni(4)     | 117.77(5)  | C(9)-S(6)-Ni(2)    | 104.1(2)   |
| S(6)-Ni(2)-Ni(4)     | 52.64(5)   | C(9)-S(6)-Ni(4)    | 115.4(2)   |
| S(10)-Ni(2)-Ni(4)    | 52.16(5)   | Ni(2)-S(6)-Ni(4)   | 75.45(6)   |
| S(8)#1-Ni(2)-Ni(4)   | 122.76(5)  | C(8)-S(7)-Ni(4)#1  | 97.8(3)    |
| S(7)-Ni(3)-S(7)#1    | 171.94(11) | C(8)-S(7)-Ni(3)    | 110.1(3)   |
| S(7)-Ni(3)-S(9)#1    | 83.66(6)   | Ni(4)#1-S(7)-Ni(3) | 86.77(6)   |
| S(7)#1-Ni(3)-S(9)#1  | 96.81(6)   | C(5)-S(8)-Ni(2)#1  | 106.7(2)   |
| S(7)-Ni(3)-S(9)      | 96.81(6)   | C(5)-S(8)-Ni(1)    | 103.7(2)   |
| S(7)#1-Ni(3)-S(9)    | 83.66(6)   | Ni(2)#1-S(8)-Ni(1) | 85.33(6)   |
| S(9)#1-Ni(3)-S(9)    | 173.40(9)  | C(6)-S(9)-Ni(4)    | 104.06(19) |
| S(7)-Ni(3)-Ni(4)#1   | 46.02(5)   | C(6)-S(9)-Ni(3)    | 104.7(2)   |
| S(7)#1-Ni(3)-Ni(4)#1 | 138.38(5)  | Ni(4)-S(9)-Ni(3)   | 84.68(6)   |

|                      |           |                   |           |
|----------------------|-----------|-------------------|-----------|
| S(9)#1-Ni(3)-Ni(4)#1 | 47.29(4)  | C(20)-S(10)-Ni(4) | 104.1(3)  |
| S(9)-Ni(3)-Ni(4)#1   | 129.40(5) | C(20)-S(10)-Ni(2) | 115.9(3)  |
| S(7)-Ni(3)-Ni(4)     | 138.38(5) | Ni(4)-S(10)-Ni(2) | 75.67(6)  |
| S(7)#1-Ni(3)-Ni(4)   | 46.02(5)  | S(7)#1-Ni(4)-S(9) | 85.29(7)  |
| S(9)#1-Ni(3)-Ni(4)   | 129.40(5) | S(10)-Ni(4)-S(9)  | 171.27(7) |
| S(9)-Ni(3)-Ni(4)     | 47.29(4)  | S(7)#1-Ni(4)-S(6) | 170.94(7) |
| Ni(4)#1-Ni(3)-Ni(4)  | 135.55(5) | S(10)-Ni(4)-S(6)  | 79.78(7)  |
| S(7)#1-Ni(4)-S(10)   | 91.64(8)  | S(9)-Ni(4)-S(6)   | 102.77(7) |

**Symmetry transformations used to generate equivalent atoms: #1  $-x+3/2, y, -z+1/2$**

**Table S10 the selected bond lengths (Å) and angles(°) for 6.**

| Bond                 | Dist.(Å)   | Bond                | Dist.(Å)   |
|----------------------|------------|---------------------|------------|
| Ni(1)-S(1)#1         | 2.191(2)   | Ni(3)-S(5)          | 2.211(2)   |
| Ni(1)-S(1)           | 2.191(2)   | Ni(3)-Ni(4)         | 2.9593(15) |
| Ni(1)-S(2)           | 2.191(2)   | Ni(4)-S(6)          | 2.184(2)   |
| Ni(1)-S(2)#1         | 2.191(2)   | Ni(4)-S(6)#1        | 2.184(2)   |
| Ni(1)-Ni(2)          | 2.9439(15) | Ni(4)-S(5)          | 2.215(2)   |
| Ni(1)-Ni(2)#1        | 2.9439(15) | Ni(4)-S(5)#1        | 2.215(2)   |
| Ni(2)-S(1)           | 2.156(2)   | Ni(4)-Ni(3)#1       | 2.9593(15) |
| Ni(2)-S(3)           | 2.180(2)   | S(1)-C(3)           | 1.814(8)   |
| Ni(2)-S(4)           | 2.196(2)   | S(2)-C(4)           | 1.771(7)   |
| Ni(2)-S(2)           | 2.214(2)   | S(3)-C(1)           | 1.829(8)   |
| Ni(2)-Ni(3)          | 2.794(2)   | S(4)-C(10)          | 1.816(8)   |
| Ni(3)-S(6)           | 2.163(2)   | S(5)-C(13)          | 1.786(8)   |
| Ni(3)-S(4)           | 2.176(2)   | S(6)-C(12)          | 1.789(8)   |
| Ni(3)-S(3)           | 2.205(2)   |                     |            |
| Angle                | (°)        | Angle               | (°)        |
| S(1)#1-Ni(1)-S(1)    | 165.44(12) | S(5)-Ni(3)-Ni(2)    | 123.31(6)  |
| S(1)#1-Ni(1)-S(2)    | 99.13(7)   | S(6)-Ni(3)-Ni(4)    | 47.40(6)   |
| S(1)-Ni(1)-S(2)      | 82.50(7)   | S(4)-Ni(3)-Ni(4)    | 129.17(6)  |
| S(1)#1-Ni(1)-S(2)#1  | 82.50(7)   | S(3)-Ni(3)-Ni(4)    | 135.41(7)  |
| S(1)-Ni(1)-S(2)#1    | 99.13(7)   | S(5)-Ni(3)-Ni(4)    | 48.11(5)   |
| S(2)-Ni(1)-S(2)#1    | 167.23(11) | Ni(2)-Ni(3)-Ni(4)   | 116.12(4)  |
| S(1)#1-Ni(1)-Ni(2)   | 142.29(6)  | S(6)-Ni(4)-S(6)#1   | 168.03(12) |
| S(1)-Ni(1)-Ni(2)     | 46.88(6)   | S(6)-Ni(4)-S(5)     | 80.96(8)   |
| S(2)-Ni(1)-Ni(2)     | 48.41(5)   | S(6)#1-Ni(4)-S(5)   | 100.14(8)  |
| S(2)#1-Ni(1)-Ni(2)   | 124.71(6)  | S(6)-Ni(4)-S(5)#1   | 100.14(8)  |
| S(1)#1-Ni(1)-Ni(2)#1 | 46.88(6)   | S(6)#1-Ni(4)-S(5)#1 | 80.96(8)   |
| S(1)-Ni(1)-Ni(2)#1   | 142.29(6)  | S(5)-Ni(4)-S(5)#1   | 169.61(12) |
| S(2)-Ni(1)-Ni(2)#1   | 124.71(6)  | S(6)-Ni(4)-Ni(3)    | 46.80(5)   |
| S(2)#1-Ni(1)-Ni(2)#1 | 48.41(5)   | S(6)#1-Ni(4)-Ni(3)  | 140.93(6)  |
| Ni(2)-Ni(1)-Ni(2)#1  | 129.77(6)  | S(5)-Ni(4)-Ni(3)    | 47.97(6)   |
| S(1)-Ni(2)-S(3)      | 100.41(9)  | S(5)#1-Ni(4)-Ni(3)  | 126.14(7)  |
| S(1)-Ni(2)-S(4)      | 177.07(8)  | S(6)-Ni(4)-Ni(3)#1  | 140.93(6)  |

|                   |           |                      |           |
|-------------------|-----------|----------------------|-----------|
| S(3)-Ni(2)-S(4)   | 78.75(8)  | S(6)#1-Ni(4)-Ni(3)#1 | 46.80(5)  |
| S(1)-Ni(2)-S(2)   | 82.75(8)  | S(5)-Ni(4)-Ni(3)#1   | 126.14(7) |
| S(3)-Ni(2)-S(2)   | 169.74(8) | S(5)#1-Ni(4)-Ni(3)#1 | 47.97(6)  |
| S(4)-Ni(2)-S(2)   | 98.56(8)  | Ni(3)-Ni(4)-Ni(3)#1  | 127.69(6) |
| S(1)-Ni(2)-Ni(3)  | 131.52(7) | C(3)-S(1)-Ni(2)      | 114.4(3)  |
| S(3)-Ni(2)-Ni(3)  | 50.80(6)  | C(3)-S(1)-Ni(1)      | 114.1(3)  |
| S(4)-Ni(2)-Ni(3)  | 49.95(6)  | Ni(2)-S(1)-Ni(1)     | 85.25(7)  |
| S(2)-Ni(2)-Ni(3)  | 120.07(6) | C(4)-S(2)-Ni(1)      | 105.8(3)  |
| S(1)-Ni(2)-Ni(1)  | 47.87(6)  | C(4)-S(2)-Ni(2)      | 113.3(3)  |
| S(3)-Ni(2)-Ni(1)  | 128.33(7) | Ni(1)-S(2)-Ni(2)     | 83.85(7)  |
| S(4)-Ni(2)-Ni(1)  | 134.74(6) | C(1)-S(3)-Ni(2)      | 114.5(3)  |
| S(2)-Ni(2)-Ni(1)  | 47.74(6)  | C(1)-S(3)-Ni(3)      | 114.6(3)  |
| Ni(3)-Ni(2)-Ni(1) | 114.70(4) | Ni(2)-S(3)-Ni(3)     | 79.17(8)  |
| S(6)-Ni(3)-S(4)   | 100.52(9) | C(10)-S(4)-Ni(3)     | 114.3(3)  |
| S(6)-Ni(3)-S(3)   | 176.73(8) | C(10)-S(4)-Ni(2)     | 113.6(3)  |
| S(4)-Ni(3)-S(3)   | 78.66(8)  | Ni(3)-S(4)-Ni(2)     | 79.46(8)  |
| S(6)-Ni(3)-S(5)   | 81.53(8)  | C(13)-S(5)-Ni(3)     | 106.8(2)  |
| S(4)-Ni(3)-S(5)   | 173.08(8) | C(13)-S(5)-Ni(4)     | 103.2(3)  |
| S(3)-Ni(3)-S(5)   | 99.65(8)  | Ni(3)-S(5)-Ni(4)     | 83.92(7)  |
| S(6)-Ni(3)-Ni(2)  | 131.71(7) | C(12)-S(6)-Ni(3)     | 113.9(3)  |
| S(4)-Ni(3)-Ni(2)  | 50.60(6)  | C(12)-S(6)-Ni(4)     | 113.5(3)  |
| S(3)-Ni(3)-Ni(2)  | 50.03(6)  | Ni(3)-S(6)-Ni(4)     | 85.79(8)  |

**Symmetry transformations used to generate equivalent atoms:** #1  $-x+3/2, -y-1/2, z$

Table S11 the crystal data for culster **3**.

| Compound                   | <b>3</b>          |
|----------------------------|-------------------|
| Crystal appearance         | black prism       |
| Crystal Size (mm)          | 0.4 × 0.20 × 0.20 |
| <i>a</i> (Å)               | 13.677(2)         |
| <i>b</i> (Å)               | 13.672(1)         |
| <i>c</i> (Å)               | 22.446(5)         |
| <i>α</i> (°)               | 90.00             |
| <i>β</i> (°)               | 90.00             |
| <i>γ</i> (°)               | 90.00             |
| <i>V</i> (Å <sup>3</sup> ) | 4197(1)           |
